# Supplementary material
Source: HighWire-hosted journal article supplement (https://jnm.snmjournals.org/highwire/filestream/95095/field_highwire_adjunct_files/0/188839_Supplemental_Data.pdf)
Supplement: 188839_Supplemental_Data.pdf [file 188839_Supplemental_Data.pdf]

**Supplemental Table 1.** Inter-criteria agreement between response assessment criteria (RECIST, irRC, EORTC, PERCIST) at SCAN-2 (3-4 weeks) and SCAN-3 (approx. 4 months).

| Compared criteria     | <u>Kappa coefficient*</u> |        |
|-----------------------|---------------------------|--------|
|                       | SCAN-2                    | SCAN-3 |
| RECIST1.1 vs. irRC    | 0.9                       | 0.765  |
| PERCIST vs. EORTC     | 0.886                     | 0.875  |
| RECIST1.1 vs. PERCIST | 0.7                       | 0.733  |
| RECIST1.1 vs. EORTC   | 0.6                       | 0.875  |
| irRC vs. PERCIST      | 0.588                     | 0.529  |
| irRC vs. EORTC        | 0.479                     | 0.659  |

\* Kappa values were calculated based on degree of agreement on tumor response between criteria. At each time point, responses were classified into one of two categories: [CR+PR+SD] vs. [PD]. EORTC, European Organisation for Research and Treatment of Cancer 1999 criteria; irRC, immune-related Response Criteria; PERCIST, PET response criteria in solid tumors; RECIST, Response Evaluation Criteria In Solid Tumors

**Supplemental Table 2.** Receiver operator characteristic (ROC) curve analyses performed to estimate capacity of CT- and PET-based measurements (continuous percentage change) collected at 3-4 weeks to predict best overall response to immune checkpoint inhibitor therapy at  $\geq 4$  months as measured by RECIST 1.1.

| Tumor response evaluation method description                                                            | Area under curve (AUC) | 95% confidence interval |
|---------------------------------------------------------------------------------------------------------|------------------------|-------------------------|
| 1) Change in sum of RECIST 1.1-based target lesion diameters                                            | 0.853                  | 0.625 to 0.968          |
| 2) Change in sum of the products of the two largest perpendicular diameters of irRC-based index lesions | 0.827                  | 0.594 to 0.955          |
| 3) Change in SULpeak of the hottest lesion                                                              | 0.680                  | 0.437 to 0.867          |
| 4) Change in sum of SUVmax of all FDG-avid metastatic lesions                                           | 0.600                  | 0.361 to 0.808          |

Method 1: change in sum of target lesion diameters, selected based on RECIST 1.1 criteria. Method 2: Change in sum of the products of the two largest perpendicular diameters of index lesions, selected based on irRC criteria. Method 3: Change in peak standardized uptake value, normalized by lean body mass, of the hottest lesion (SULpeak) seen on PET scan. (PERCIST 1.0). Method 4: Change in the sum of maximum standardized uptake value (SUVmax) of all FDG-avid metastatic lesions. FDG, fluorodeoxyglucose; irRC, immune-related Response Criteria; PERCIST, PET response criteria in solid tumors; RECIST, Response Evaluation Criteria In Solid Tumors; SD, stable disease.

**Supplemental Table 3.** Percent change in tumor burden SCAN-1 to SCAN-2 measured using 4 methods, compared with response per RECIST1.1 at SCAN-2 and best overall response at  $\geq 4$  months.

| Pt No. | Method of measuring SCAN-1 to SCAN-2 percent change in tumor burden  |                                                                                                                 |                                                    |                                                                       | Tumor response per RECIST 1.1 at SCAN-2 | Best overall response at $\geq 4$ months |
|--------|----------------------------------------------------------------------|-----------------------------------------------------------------------------------------------------------------|----------------------------------------------------|-----------------------------------------------------------------------|-----------------------------------------|------------------------------------------|
|        | 1) Percent change in sum of RECIST 1.1-based target lesion diameters | 2) Percent change in sum of the products of the two largest perpendicular diameters of irRC-based index lesions | 3) Percent change in SULpeak of the hottest lesion | 4) Percent change in sum of SUVmax of all FDG-avid metastatic lesions |                                         |                                          |
| 1      | 46.27                                                                | 136.77                                                                                                          | 24.94                                              | 43.10                                                                 | PD                                      | PD                                       |
| 2      | 18.60                                                                | 45.88                                                                                                           | 25.05                                              | 18.58                                                                 | SD                                      | SD                                       |
| 3      | 42.19                                                                | 80.58                                                                                                           | 79.80                                              | 95.76                                                                 | PD                                      | PD                                       |
| 4      | 27.85                                                                | 88.42                                                                                                           | 10.35                                              | 6.49                                                                  | PD                                      | PD                                       |
| 5      | 51.11                                                                | 248.21                                                                                                          | 0.00                                               | 14.66                                                                 | PD                                      | PD                                       |
| 6      | 0.00                                                                 | 14.96                                                                                                           | -31.60                                             | -45.11                                                                | SD                                      | PD                                       |
| 7      | 6.19                                                                 | 7.23                                                                                                            | -0.96                                              | -5.73                                                                 | SD                                      | PD                                       |
| 8      | 36.54                                                                | 51.22                                                                                                           | 15.46                                              | 38.98                                                                 | PD                                      | PD                                       |
| 9      | 21.95                                                                | 58.43                                                                                                           | 12.97                                              | 4.68                                                                  | PD                                      | PD                                       |
| 10     | 12.50                                                                | 26.14                                                                                                           | 65.35                                              | 57.41                                                                 | SD                                      | PD                                       |
| 11     | 0.00                                                                 | 20.00                                                                                                           | 61.70                                              | 113.21                                                                | SD                                      | CR                                       |
| 12     | 7.26                                                                 | 18.35                                                                                                           | -41.02                                             | -40.32                                                                | SD                                      | PD                                       |
| 13     | 8.57                                                                 | 47.95                                                                                                           | -5.74                                              | 1.80                                                                  | PD*                                     | PD                                       |
| 14     | -10.00                                                               | -28.95                                                                                                          | 21.39                                              | 36.79                                                                 | SD                                      | PR                                       |
| 15     | 45.95                                                                | 150.84                                                                                                          | 45.74                                              | 63.24                                                                 | PD                                      | PD                                       |
| 16     | 0.00                                                                 | -14.66                                                                                                          | 37.22                                              | 37.26                                                                 | SD                                      | PR                                       |
| 17     | -31.71                                                               | -44.68                                                                                                          | -25.00                                             | -63.25                                                                | PR                                      | CR                                       |
| 18     | -23.64                                                               | -44.07                                                                                                          | -32.81                                             | -23.51                                                                | SD                                      | PD                                       |

|    |       |       |        |        |     |    |
|----|-------|-------|--------|--------|-----|----|
| 19 | 8.22  | 38.66 | -13.91 | -29.11 | PD* | PD |
| 20 | 20.73 | 38.03 | -7.98  | -1.82  | PD  | PD |

Changes in tumor burden seen on PET/CT scans from baseline (SCAN-1) to 3-4 weeks (SCAN-2) were calculated using 4 methods, each based on standard response criteria. Method 1: change in sum of target lesion diameters, selected based on RECIST 1.1 criteria. Method 2: Change in sum of the products of the two largest perpendicular diameters of index lesions, selected based on irRC criteria. Method 3: Change in peak standardized uptake value, normalized by lean body mass, of the hottest lesion (SULpeak) seen on PET scan. (PERCIST 1.0). Method 4: Change in the sum of maximum standardized uptake value (SUVmax) of all FDG-avid metastatic lesions. CR, complete response; FDG, fluorodeoxyglucose; irRC, immune-related Response Criteria; PD, progressive disease; PD\*, progressive disease due to appearance of new lesion on SCAN-2; PERCIST, PET response criteria in solid tumors; PR, partial response; RECIST, Response Evaluation Criteria In Solid Tumors; SD, stable disease.
